# Supplementary material for: Factors Associated with COVID-19 Vaccine Hesitancy among People with Epilepsy in Lithuania
Source: MDPI journal article supplement (doi:10.3390/ijerph18084374), 2021-04-20
Supplement: s1 [file s1]

## Translated questionnaire from Lithuanian

All items were spread throughout the page for comfortable reading in the platform “Google Forms” (Google, Inc.)

**Your status** ☐ Person with epilepsy ☐ Caregiver (please provide information about the person you care for)

### General questions

**Age**\_\_\_\_ **Sex** ☐ Male ☐ Female **Seizure type** ☐ Focal (episodes without falling and having whole-body seizures that may include other symptoms) ☐ Generalized (“whole-body” seizures, you usually do not feel the seizure starting) ☐ Generalized (absence or myoclonic seizures) ☐ Unknown -Other\_\_\_\_ **Number of antiseizure drugs (ASDs) used** ☐ 0 ☐ 1 ☐ 2 ☐ 3 ☐ 4 or more ASDs –Fill-in ASDs used\_\_\_\_

**Have you changed your ASDs or their dosage in 2020 as recommended by your physician?** ☐ Yes, the dosage was increased or new ASDs were added ☐ Yes, one ASD was changed into another ☐ Yes, the dosage was decreased or some ASD was discontinued ☐ No, I used ASDs as usual ☐ I do not use ASDs

**Have you changed your ASDs or their dosage in 2020 yourself?** ☐ Yes, I increased the dosage or added new ASDs ☐ Yes, I changed one ASD into another ☐ Yes, I decreased the dosage or discontinued some ASDs ☐ No, I used ASDs as usual ☐ I do not use ASDs

**How frequently do you currently experience seizures?** ☐ Several times per day ☐ Several times per week ☐ Several times per month ☐ Several times per year ☐ Once per year ☐ Less than once every year ☐ I do not have seizures for 5 years or longer

**How frequently did you experience seizures in summer of 2020?** ☐ Several times per day ☐ Several times per week ☐ Several times per month ☐ Once per month ☐ Once ☐ None

### COVID-19

**Were you confirmed to have COVID-19?** ☐ Yes ☐ No -If yes, which month? \_\_\_\_ (selection from a list)

**Which of these symptoms of COVID-19 did you experience?** ☐ Fever ☐ Dry cough ☐ Tiredness ☐ Aches and pains ☐ Sore throat ☐ Diarrhea ☐ Conjunctivitis (red eye, lacrimation, itching) ☐ Headache ☐ Loss of taste or smell ☐ A rash on skin, or discoloration of fingers or toes ☐ Difficulty breathing or shortness of breath ☐ Chest pain or pressure ☐ Inability to speak or move ☐ Stroke ☐ Loss of consciousness (but not because of a seizure) -Other\_\_\_\_

**Did the frequency of your seizures change when having COVID-19?** ☐ Yes, increase by two times or more ☐ Yes, increase by up to two times ☐ No ☐ Yes, decrease by up to two times ☐ Yes, decrease by two times or more

**Presumed place of infection** ☐A public place (shop, mass event etc.) ☐Home (infection from family members) ☐Home (infection from a non-family member) ☐Workplace or education institution ☐Healthcare institution (hospital, rehabilitation center) ☐Healthcare institution (outpatient clinic) ☐Unknown -Other\_\_\_\_

**Who provided information concerning COVID-19 after confirming the infection?** ☐A general practitioner ☐A specialist from the National Center for Public Health ☐A specialist in neurology (general) ☐A specialist in epileptology ☐A physician in an ambulance ☐A physician at the emergency department ☐No one -Other\_\_\_\_

**Were you hospitalized because of COVID-19?** ☐Yes ☐No **If yes, for how many days?**\_\_\_\_

**Were you in an intensive care unit because of COVID-19?** ☐Yes ☐No ☐I don't know

**Did you change your ASD use (drugs, dose or rate) when having COVID-19?** ☐Yes ☐No

**Do you have any comorbidities?** ☐Disorders of heart and circulation ☐Lung diseases ☐Diabetes mellitus ☐Chronic kidney diseases ☐Chronic liver/pancreatic conditions -Other\_\_\_\_

#### Vaccines

**How much (from 1 to 10) are you waiting for a COVID-19 vaccine to arrive to Lithuania?**

|            | 1                        | 2                        | 3                        | 4                        | 5                        | 6                        | 7                        | 8                        | 9                        | 10                       |           |
|------------|--------------------------|--------------------------|--------------------------|--------------------------|--------------------------|--------------------------|--------------------------|--------------------------|--------------------------|--------------------------|-----------|
| Not at all | <input type="checkbox"/> | Very much |

**Were you used to vaccinating against influenza before the pandemic?** ☐Yes ☐No

**Were you vaccinated against influenza in 2020?** ☐Yes ☐No

**Were you vaccinated against Pneumococcal infections in 2020?** ☐Yes ☐No

**Would you accept to be vaccinated against COVID-19 for free?** ☐Yes ☐No

**Would you accept to be vaccinated against COVID-19 if the vaccine was not free?** ☐Yes ☐No

**Why would you not accept to be vaccinated against COVID-19?** ☐I believe that vaccines cause COVID-19 ☐I believe that vaccines may have long-term side effects ☐I do not believe that the vaccine is effective to stop the spread of COVID-19 ☐I believe that I cannot vaccinate because of epilepsy ☐Because of the price of the vaccine (if it was paid) -Other\_\_\_\_

**Please indicate, whether you believe these statements to be true or false:**

**Vaccines are safe for most people and do not cause long-term side effects or complications** ☐True  
☐False

**Vaccines may cause the infectious disease they aim to prevent** ☐True ☐False

**Vaccination is the only way to gain immunity apart from acquiring the disease itself** ☐True ☐False

**Vaccination is also useful for healthy people with no existing disease** ☐True ☐False

**There is a natural decrease of viral infections, regardless of the use of vaccines** ☐True ☐False

**What would be your primary source of information considering COVID-19 vaccines?** ☐A general practitioner ☐A pharmacist ☐A specialist in neurology (general) ☐A specialist in epileptology ☐Friends and family members ☐Internet ☐Television -Other\_\_\_\_\_
